# Supplementary material for: Effect of curvature and placement of donor and acceptor units in cycloparaphenylenes: a computational study
Source: Royal Society of Chemistry journal article supplement (doi:10.1039/d0sc03923c), 2020-01-01
Supplement: d0sc03923c1.pdf [file d0sc03923c1.pdf]

Below is a link to the output calculation files for coordinates, StrainViz, and NICS data.

[https://figshare.com/articles/dataset/SI\\_Donor\\_and\\_Acceptor\\_Units\\_in\\_Cycloparaphenylenes\\_zip/12671084](https://figshare.com/articles/dataset/SI_Donor_and_Acceptor_Units_in_Cycloparaphenylenes_zip/12671084)

Figshar DOI: 10.6084/m9.figshare.12671084
